# Supplementary material for: Psycho-Oncological Counselling for Mental Health in South Australians with Cancer
Source: Hindawi journal article supplement (doi:10.1155/2024/2131827), 2024-01-23
Supplement: f1 [file 2131827.f1.docx]

**Appendix A**

**Community Counselling Service Study 2020**

We are collecting information from people who use the Cancer Counselling Service in order to ensure that we are providing the best possible service to people who have been affected by cancer. Participation is entirely voluntary and involves completing two brief measures, one which you have already completed and one now that you have completed your final counselling session. If you would like to know more about how this information is used, your counsellor can provide you with further information, or you can contact the Project Officer

If you do choose to participate, completing this questionnaire will only take a few minutes, and any information you provide us is strictly confidential. You do not have to participate if you do not want to, and you are free to withdraw at any time. Your participation or non-participation in this evaluation will in no way impact the service you receive from the counsellors at this service.

On the thermometer diagram to the right, please circle the number (0-10) that best describes how much distress you have been experiencing in the past week including today.


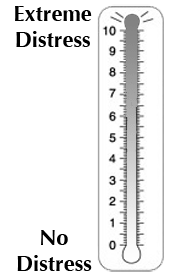


| ***Please circle one response per statement that best applies to you over the last 7 days.*** | | | |
| --- | --- | --- | --- |
|  | | | |
| **I feel tense or ‘wound up’** | | | |
| Most of the time | A lot of the time | From time to time/occasionally | Not at all |
|  |  |  |  |
| **I feel as if I am slowed down** | | | |
| Nearly all the time | Very often | Sometimes | Not at all |
|  |  |  |  |
| **I still enjoy the things I used to enjoy** | | | |
| Definitely as much | Not quite as much | Only a little | Hardly at all |
|  |  |  |  |
| **I get a sort of frightened feeling like ‘butterflies’ in the stomach** | | | |
| Not at all | Occasionally | Quite often | Very often |
|  |  |  |  |
| **I get a sort of frightened feeling as if something awful is about to happen** | | | |
| Very definitely and quite badly | Yes, but not too badly | A little, but it doesn't worry me | Not at all |
|  |  |  |  |
| **I have lost interest in my appearance** | | | |
| Definitely | I don’t take as much care as I should | I may not take quite as much care | I take just as much care as ever |
|  |  |  |  |
| **I can laugh and see the funny side of things** | | | |
| As much as I always could | Not quite so much now | Definitely not so much now | Not at all |
|  |  |  |  |
| **I feel restless as if I have to be on the move** | | | |
| Very much indeed | Quite a lot | Not very much | Not at all |
|  |  |  |  |
| **Worrying thoughts go through my mind** | | | |
| A great deal of the time | A lot of the time | From time to time, but not too often | Only occasionally |
|  |  | |  |
| **I look forward with enjoyment to things** | | | |
| As much as I ever did | Rather less than I used to | Definitely less than I used to | Hardly at all |
|  |  |  |  |
| **I feel cheerful** | | | |
| Not at all | Not often | Sometimes | Most of the time |
|  |  |  |  |
| **I get sudden feelings of panic** | | | |
| Very often indeed | Quite often | Not very often | Not at all |
|  |  |  |  |
| **I can sit at ease and feel relaxed** | | | |
| Definitely | Usually | Not often | Not at all |
|  |  |  |  |
| **I can enjoy a good book or radio or TV program** | | | |
| Often | Sometimes | Not often | Very seldom |

***Please answer the following as openly and honestly as possible.***

| **I participated in counselling for…….. months** |
| --- |
| **I had ……… (number) of sessions** |
|  |
| **Have you had intimate supportive conversations with other people concerning your present life situation, that is, with regard to your or your family member’s cancer illness? *(please tick)*** |
| Yes  No |
| *If Yes*, with about how many people? ………. |
| *If Yes*, with whom? *(please tick)* |
| Family/close friends  Friends/acquaintances  Workmates |
| Co-patients  Health staff  Other |
|  |
| **What were your expectations with regards to counselling before you started?** |
|  |
|  |
|  |
|  |
|  |
|  |
|  |
| **Have your expectations been fulfilled? *(please check the most suitable response)*** |
| More than expected I am satisfied  I am rather satisfied |
| I am disappointed |
| Other Comments….. |
|  |
|  |
|  |
|  |
|  |

| **How have you benefited from counselling? *(please check one or more of the following that apply to you)*** |
| --- |
| increased understanding of my reactions and feelings which I have experienced during the process of my (or my family member’s) cancer illness |
| increased distance from my situation |
| felt that the counsellor saw me as a person in my own right |
| had the opportunity to practice talking about my life situation |
| felt less frightened |
| appreciated the joys of everyday life from a more profound perspective |
| become less tired/fatigued |
| felt more initiative |
| Other *(please expand below)* |
|  |
|  |
|  |
|  |
| **Has the counselling helped you manage ordinary everyday life situations in a different manner than previously?** |
| Yes  No  Don’t know |
| *If Yes*, please check the most appropriate alternative |
| Much Better Somewhat better Somewhat worse  Much worse |
| Comments……. |
|  |
|  |
|  |
|  |
|  |
| **Please describe a concrete situation in which you experienced that counselling benefited you………** |
|  |
|  |
|  |
|  |
|  |
|  |
|  |
|  |
|  |

| **Is there anything else that you have done which has helped you?** |
| --- |
|  |
|  |
|  |
|  |
|  |
|  |
| **Any other comments** |
|  |
|  |
|  |
|  |
|  |
|  |
|  |
|  |
|  |

### Thank you for taking the time to complete this survey; your feedback is very important to us. Please place your completed survey in the return envelope provided.
